# A reliable and efficient adaptive Bayesian method to assess static lower limb proprioception

Jonathan M Wood<sup>1,2</sup>, \*Susanne M Morton<sup>1,2</sup>, \*Hyosub E Kim<sup>1,2,3</sup>

\*Both authors contributed equally

1. Department of Physical Therapy, University of Delaware, Newark, DE 19711, United States
2. Biomechanics and Movement Sciences Program, University of Delaware, Newark, DE 19711, United States
3. Department of Psychological and Brain Sciences, University of Delaware, Newark, DE 19716, United States

## Abstract

### Background

Lower limb proprioception is critical for maintaining stability during gait and may impact how individuals modify their movements in response to changes in the environment and body state, a process termed “sensorimotor adaptation”. However, the connection between lower limb proprioception and sensorimotor adaptation during human gait has not been established. We suspect this gap is due in part to the lack of reliable, efficient methods to assess global lower limb proprioception in an ecologically valid context.

### New Method

We assessed static lower limb proprioception using an alternative forced choice task, administered twice to determine test-retest reliability. Participants stood on a dual-belt treadmill which passively moved one limb to stimulus locations selected by a Bayesian adaptive algorithm. At the stimulus locations, participants judged relative foot positions and the algorithm estimated the point of subjective equality (PSE) and the uncertainty of lower limb proprioception.

### Results

Using the Bland-Altman method, combined with Bayesian statistics, we found that both the PSE and uncertainty estimates had good reliability.

### Comparison with Existing Method(s)

Current methods assessing static lower limb proprioception do so within a single joint, in non-weight bearing positions, and rely heavily on memory. One exception assessed static lower limb proprioception in standing but did not measure reliability and contained confounds impacting participants’ judgments, which we experimentally controlled here.

### Conclusions

This efficient and reliable method assessing lower limb proprioception will aid future mechanistic understanding of locomotor adaptation and serve as a useful tool for basic and clinical researchers studying balance and falls.

## 51 1. Introduction

52  
53 Lower limb proprioception is critical for maintaining upright stability and regulating the gait cycle.  
54 The proprioceptive sense is formed through a combination of inputs, mostly from muscle spindles  
55 and Golgi tendon organs, but also cutaneous and joint capsule receptors (Proske and Gandevia,  
56 2012). Here, we are most interested in proprioception as it relates to static lower limb position  
57 sense. Static lower limb position sense contributes to balance and stability as evidenced by  
58 studies showing that impaired static lower limb proprioception is associated with higher fall risk  
59 (Lord et al., 1991; Lord and Ward, 1994; Ribeiro and Oliveira, 2007). In addition to its contributions  
60 to posture and stability, static lower limb proprioception may also impact how individuals implicitly  
61 adapt their gait pattern in response to changes in the environment or body state (e.g., fatigue)  
62 (Bruijn et al., 2012; Bunday and Bronstein, 2009), a learning process termed “sensorimotor  
63 adaptation” (Prokop et al., 1995; Reisman et al., 2005). This link between static proprioception  
64 and sensorimotor adaptation is well established in upper-extremity reaching (Cressman and  
65 Henriques, 2009; Harris, 1963; Henriques and Cressman, 2012; Mattar et al., 2013; Ostry et al.,  
66 2010; Simani et al., 2007; Tsay et al., 2022). However, no causal link between proprioception and  
67 locomotor adaptation has been clearly established in humans, which is surprising given how  
68 dependent normal walking is on reliable proprioceptive estimates (Dietz, 2002; Hiebert et al.,  
69 1996; Kriellaars et al., 1994; Pearson, 2004; Roden-Reynolds et al., 2015; Whelan et al., 1995).  
70 We suggest that this discrepancy exists because of the way proprioception is measured in the  
71 lower limb. Specifically, most lower limb proprioception assessments are not performed in an  
72 ecologically valid context, and those that are lack established reliability and validity (Sombric et  
73 al., 2019; Vazquez et al., 2015). In order to address these limitations, we have developed a new  
74 psychophysical method for assessing lower limb proprioception.

75  
76 We first considered the measurement of lower limb proprioception in a context that most closely  
77 approximates gait. Current methods assessing static lower limb proprioception often do so within  
78 a single joint, in a non-weight bearing position, and rely heavily on remembered positions (Han et  
79 al., 2016; Hillier et al., 2015; Horváth et al., 2022). While these methods have proven useful for  
80 characterizing specific deficits in joint proprioception after orthopedic injury (e.g., Relph et al.,  
81 2014), they cannot be readily translated to functional lower extremity movements. This is because  
82 a unified percept of limb location results from the nervous system’s integration of proprioceptive  
83 signals across multiple limb joints (Bosco et al., 2000; Fuentes and Bastian, 2010; Gandevia,  
84 1985; Proske and Gandevia, 2012; Soechting, 1982). The body position in which proprioception  
85 is measured is also important because differences in proprioceptive estimates emerge in weight  
86 bearing vs non-weight bearing positions both in the upper limb (Ansems et al., 2006) and in the  
87 knee joint (Bullock-Saxton et al., 2001; Stillman and McMeeken, 2001). For these reasons, we  
88 measured whole lower limb proprioception while standing as this provides the closest  
89 approximation to gait.

90  
91 A comprehensive way of characterizing a sensory system is using a psychophysical assessment  
92 to estimate two of its distinct physiologic characteristics: the point of subjective equality (PSE)  
93 and the uncertainty. The PSE is the stimulus that is perceived as equal to another stimulus,  
94 reflecting the limits of a sensory system to discriminate between two stimuli. In the context of the  
95 current study, the PSE is the location where participants perceive the two lower limbs are  
96 symmetrical. The PSE can also be translated to a measure of proprioceptive accuracy by  
97 calculating the difference between the PSE and actual equality (i.e., a proprioceptive bias).  
98 Uncertainty refers to the variability in responses surrounding the PSE, reflecting the noise within  
99 the sensory system. The PSE (in terms of a proprioceptive bias) and uncertainty seem to play  
100 distinct roles in sensorimotor adaptation (Ruttle et al., 2021; Tsay et al., 2021). While upper  
101 extremity proprioceptive biases shift as a result of sensorimotor adaptation, proprioceptive

102 uncertainty at baseline predicts the magnitude of sensorimotor adaptation. The proprioceptive  
103 shift and uncertainty estimates themselves are uncorrelated (Tsay et al., 2021). Thus, it is  
104 important to reliably estimate both the PSE and uncertainty.

105  
106 A widely accepted method of estimating both the PSE and uncertainty is to use a two-alternative  
107 forced choice (2AFC) task, where, in the context of the current study, participants judge the  
108 relative positions of their feet when placed at various locations. The response data are then fit  
109 with a psychometric function, where the inflection point (i.e., the probability of a response being  
110 0.5), represents the PSE and the slope of the function is inversely proportional to the uncertainty  
111 (Kingdom and Prins, 2016). We know of two studies that used an AFC task to estimate both PSE  
112 and uncertainty of lower limb proprioception (Vazquez et al., 2015; Waddington and Adams,  
113 1999). However, the Waddington study used active repositioning focused on only ankle inversion  
114 and eversion movements, whereas the Vazquez study did not measure or report the reliability of  
115 their method. Furthermore, in the latter study participants' responses were heavily impacted by  
116 the direction in which the test limb was moved to the stimulus position, which was either always  
117 forward or always backward depending on group assignment. Ideally, in a static assessment of  
118 lower limb proprioception, the movement of the limbs to stimulus positions should not exert any  
119 influence on participants' judgments. Therefore, while a method like the one used in the study by  
120 Vazquez and colleagues offers promise, adjustments are needed to improve the validity of  
121 responses, and the reliability of the estimates must be assessed.

122  
123 Efficiency is also critical for assessing changes in proprioception in single-session motor learning  
124 studies, when considering factors such as clinical feasibility, and to maintain participant safety,  
125 as standing still for long periods can lead to syncope (Jardine et al., 2018). In the most established  
126 psychophysical method, the method of constant stimuli, participants make the same number of  
127 sensory judgements at each pre-determined stimulus location. However, this method is inefficient  
128 because some of the stimulus locations provide little information about the PSE or uncertainty  
129 estimates (Kingdom and Prins, 2016; Leek, 2001; Watson and Fitzhugh, 1990). Indeed, Kingdom  
130 and Prins (Kingdom and Prins, 2016, p. 57) suggested that as many as 400 trials are required to  
131 accurately estimate both the PSE and uncertainty. Adaptive psychophysical methods, where the  
132 stimulus locations are selected based on prior responses, were specifically developed to solve  
133 this efficiency problem (Leek, 2001). The Psi algorithm is one such method that uses Bayesian  
134 estimation to calculate PSE and uncertainty values after each trial. It then chooses the next  
135 stimulus that will maximize the information gained for both estimates on the subsequent trial  
136 (Kontsevich and Tyler, 1999). This method results in more efficient and accurate estimates of  
137 both the PSE and slope compared to the method of constant stimuli (King-smith and Rose, 1997;  
138 Kontsevich and Tyler, 1999; Livesey and Livesey, 2016; Turpin et al., 2010). The Psi algorithm is  
139 most frequently used in visual and auditory psychophysics, and we note only one instance where  
140 it was used to estimate (wrist) proprioception (Elangovan et al., 2018).

141  
142 Here, we implemented an adapted version of the Psi algorithm and measured its reliability in  
143 assessing lower limb proprioception in an ecologically valid context using a test-retest design. We  
144 first wanted to ensure that participant responses were not confounded by the direction of  
145 movement to each stimulus location, a concern we had based on a prior study (Vazquez et al.,  
146 2015). Then, to assess reliability across test sessions, we calculated agreement, defined as the  
147 ability for a test to reproduce the same values when measured at different times, using the Bland-  
148 Altman method (Altman and Bland, 1983; Giavarina, 2015). In addition, we used Bayesian  
149 statistics to fully quantify the probability that the method has good agreement, defined as low  
150 evidence of bias in the PSE and uncertainty estimates across the two tests. Combined, we found  
151 that, with the current method, movement direction did not impact participant responses, and good  
152 agreement for both the PSE and uncertainty could be achieved after only 50 trials.

153  
154  
155  
156  
157  
158  
159  
160  
161  
162  
163  
164  
165  
166  
167  
168  
169  
170  
171  
172  
173  
174  
175  
176  
177  
178  
179  
180  
181  
182  
183  
184  
185  
186  
187  
188  
189  
190  
191  
192  
193  
194  
195  
196  
197  
198  
199  
200  
201  
202  
203

## 2. Materials and methods

### 2.1. Participants

Young healthy participants between the ages of 18 and 35 were recruited from the University of Delaware community. Participants were excluded if they had any chronic or recent musculoskeletal or neurologic diagnoses, pain, or impaired sensation. This work was completed in accordance with the Code of Ethics of the World Medical Association. All participants provided written informed consent prior to being enrolled into the study. This study was approved by the University of Delaware Institutional Review Board.

### 2.2. Motion capture

Participants stood on a dual-belt treadmill instrumented with two force plates, one under each belt (Bertec, Columbus OH). We obtained kinematic data, sampled at 100Hz, using an eight-camera Vicon MX40 motion capture system with Nexus software (Vicon Motion Systems Inc., London, UK). Seven retroreflective markers were placed on participants' shoes and ankles in the following locations: bilateral heels, bilateral lateral malleoli, bilateral 5<sup>th</sup> metatarsal head, and the left 1<sup>st</sup> metatarsal head. We used custom written MATLAB scripts (version 2022a, MathWorks, Natick, MA) to control the treadmill belts and obtain live kinematic and kinetic data from Nexus software.

### 2.3. AFC task

We used a two-AFC task to measure lower limb proprioception. To measure test-retest reliability, each participant performed the test twice on the same day, with a 20-minute break between tests. For each test, participants stood on a treadmill with vision of their legs occluded with a black drape, and auditory feedback (sounds of the treadmill belts/motors) occluded with noise cancelling headphones (Figure 1A). The primary kinematic variable for the test was foot position difference (in millimeters):

$$\text{Foot position difference} = \text{Left marker}_{y_{pos}} - \text{Right marker}_{y_{pos}} \quad (1)$$

We used the lateral malleoli markers to measure foot position difference. Thus, positive values indicate the left foot was forward of the right foot, while negative values indicate the left foot was behind. Since the foot is the end-effector for the lower limb, we assume judgements were made by combining proprioceptive information across lower limb joints. The right foot served as the reference foot and did not move throughout the test. The left foot served as the test foot and was passively moved by the left treadmill belt to the stimulus positions, measured in terms of foot position difference. After participants performed two practice trials to orient them to the task, their heels were aligned so that everyone started from the same position relative to the laboratory's y-axis. Since there may still be differences in the ankle markers along the y-axis in this position, we corrected for this baseline difference (rounded to the nearest millimeter) for stimulus positions and PSE estimates. Each test was comprised of 75 trials, and each trial had two parts: 1) movement to a start position, 2) movement to a stimulus position.

The treadmill moved the test foot to a start position at a speed selected from a uniform distribution between 40 and 50 mm/s (Figure 1B, top). We controlled for the potential bias in responses caused by movement direction by providing pseudorandomized start positions so that the test foot started in front of the stimulus position 38 times and behind the stimulus 37 times. Therefore, we assume any bias in responses from always moving to the stimulus from the same direction

204 would be washed out, something we confirmed in our formal analysis (see Section 3.1). The  
 205 specific start position on a given trial,  $t$ , was selected from one of two normal distributions centered  
 206 around either -100 or +100 mm of foot position difference depending on the movement direction  
 207 for that trial. Both distributions had a standard deviation of 5 mm:  
 208

$$209 \text{ Start position}_{[t]} \sim \begin{cases} \mathcal{N}(+100, 5), & \text{if movement direction}_{[t]} == \text{backward} \\ \mathcal{N}(-100, 5), & \text{if movement direction}_{[t]} == \text{forward} \end{cases} \quad (2)$$

210  
 211 After a 0-2 second pause at the start position, the test foot was moved to a stimulus position at a  
 212 speed selected from a uniform distribution between 10 and 30 mm/s (Figure 1B, bottom). The  
 213 stimulus positions were located at 21 possible foot difference locations: every 10 mm interval  
 214 between -100 to +100 mm. Most stimulus positions were selected using the Psi algorithm (see  
 215 section 2.5). However, we inserted pre-selected stimulus locations to keep participants engaged  
 216 in the task. There were two types of pre-selected stimuli: 1) far stimuli ( $\pm 100$  or  $\pm 90$ ) inserted  
 217 randomly once every 10 trials, and 2) near stimuli ( $\pm 10$ ,  $\pm 20$  or  $\pm 30$  mm from the current PSE  
 218 estimate, rounded to the nearest stimulus location) inserted randomly once every 5 trials. No  
 219 preselected stimuli were inserted within the first 5 trials.  
 220

221 Each time the test foot reached its stimulus position, the treadmill stopped, and a prompt appeared  
 222 on a monitor in front of the participant: "Do you feel your right or left foot is more forward?" The  
 223 participant's response was recorded by the experimenter using a custom graphical user interface  
 224 (GUI) in MATLAB.  
 225

226 Before the test, participants were instructed to keep their weight equally distributed between both  
 227 feet, measured with the force plates under each treadmill belt and displayed for the experimenter.  
 228 If participants consistently kept greater than ~60% of their weight through one foot, a verbal  
 229 reminder was provided. We implemented short breaks after 25 and 50 trials to prevent fatigue  
 230 and blood pooling in the legs. Before the break, current marker positions were recorded from  
 231 Nexus software, then the participant was asked to walk around the lab for ~30 seconds. After the  
 232 participant stepped back onto the treadmill, we positioned their feet so the ankle markers were  
 233 back to the exact location from which they started and then testing continued.  
 234

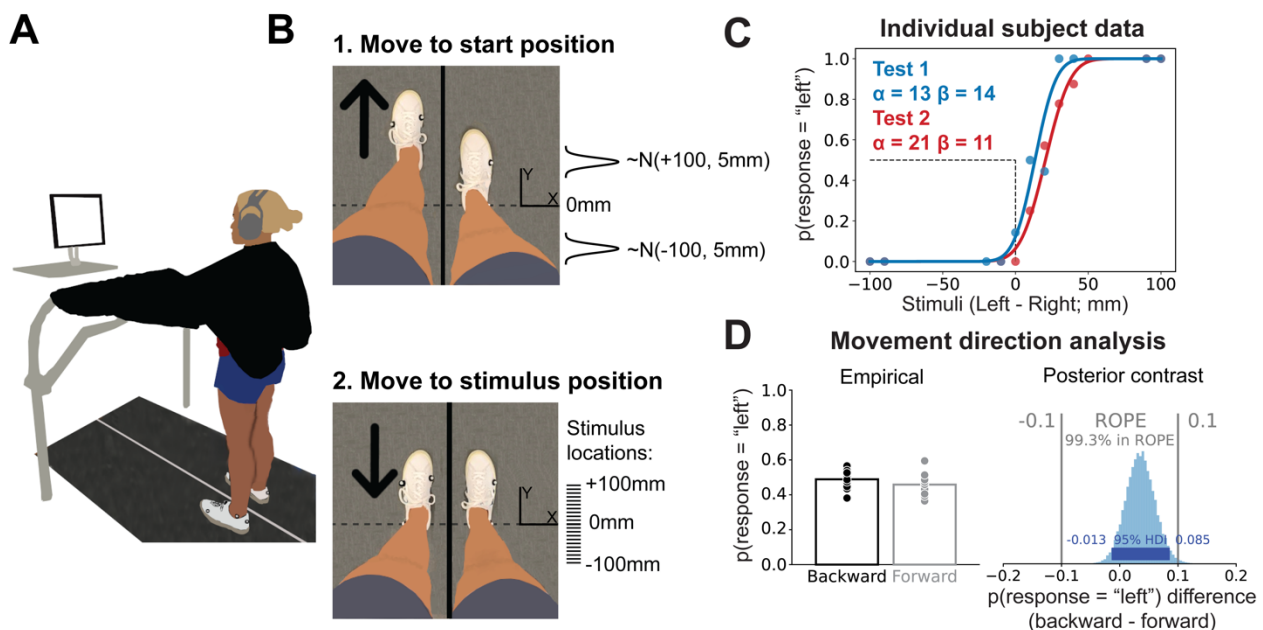

235

236 **Figure 1. Task setup, representative data, and movement direction analysis. (A)** AFC task setup. Participants  
237 stood on the split-belt treadmill with visual feedback of their legs occluded by a black drape and auditory feedback  
238 occluded by noise cancelling headphones. The screen prompted participants to verbally respond to the question “Do  
239 you feel like your right or left foot is more forward?” when the test foot stopped at the stimulus location. **(B)** Trial  
240 sequence. 1) The test foot was moved to a start position either in front of or behind the stimulus position. Start positions  
241 were sampled from one of two normal distributions, depending on the movement direction assigned for that specific  
242 trial. 2) The test foot was moved to one of 21 possible stimulus positions between -100 and +100 mm. Tick marks  
243 (drawn to scale) represent each possible stimulus location. **(C)** Individual participant data. We reconstructed the  
244 psychometric functions from the PSE ( $\alpha$ ) and uncertainty ( $\beta$ ) estimates for Test 1 (blue) and Test 2 (red). The dashed  
245 black lines, provided as a reference, represent a PSE of 0 mm. The individual dots represent the participant’s response  
246 data for each test. **(D)** Movement direction analysis. We measured the mean empirical probability of responding left  
247 when the movement direction to the stimulus position was forward (gray) vs backward (black). Dots represent  
248 individuals. We also used a Bayesian logistic regression model to analyze the unique impact of each movement  
249 direction on participant responses by calculating the difference between the posterior estimates of the movement  
250 direction coefficients (one for forward movement, one for backwards) of every participant, yielding a posterior contrast  
251 distribution (histogram) which we compared to a region of practical equivalence (ROPE). We note that 99.3% of the  
252 posterior distribution is within the ROPE, confirming that responses were not biased by movement direction to the  
253 stimulus position.

254

#### 255 2.4. Psychometric function

256

257 Each participant’s probability of responding that the test foot was more forward at each stimulus  
258 position ( $x$ ) was represented as a normal cumulative distribution function (cdf) with two  
259 parameters:

260

$$261 \psi(x) = \text{normcdf}(x; \alpha, \beta) \quad (3)$$

262

263 The  $\alpha$  parameter, the mean or inflection point of the cdf, represents the PSE, corresponding to  
264 the position that the participant perceives the feet were in the same location along the laboratory’s  
265 y-axis (i.e., where the probability of judging “left” is exactly 0.5). The  $\beta$  parameter, the standard  
266 deviation of the cdf, represents the uncertainty, which reflects the noise within the sensory system  
267 itself. Both are measured in terms of foot position difference. The  $\alpha$  and  $\beta$  parameters were  
268 estimated adaptively on each trial using the Psi algorithm. Of note, in our pilot testing the  
269 probability of responding left at -100 and +100 was consistently 0 or 1, respectively. Thus, we did  
270 not include the lapse and guess rate parameters that are sometimes used in psychometric  
271 functions for AFC tasks.

272

#### 273 2.5. Psi Algorithm

274

275 Here we provide a brief description of the Psi algorithm, which is described in detail by Kostovich  
276 and Tyler (1999). There are two primary components of the Psi algorithm: 1) stimulus selection  
277 and 2) parameter estimation.

278

##### 279 2.5.1 Stimulus selection

280

281 Before each trial, the Psi algorithm simulates responses at each possible stimulus location for the  
282 next trial, calculating a simulated joint posterior distribution using Bayes’ rule. The simulated joint  
283 posterior distribution ( $p_{sim}$ ) contains the probability of every possible combination of  $\alpha$  and  $\beta$   
284 values given the simulated responses and the stimulus location. Information entropy ( $H$ ), a  
285 measure of the magnitude of uncertainty in a probability distribution, is calculated for each  
286 stimulated posterior distribution:

287

$$288 H_{[x]} = - \sum_i p_{sim[i]} \log_2 p_{sim[i]} \quad (4)$$

289  
290 The stimulus position that minimizes the information entropy is selected for the subsequent trial  
291 as it provides the most certainty and thus the greatest gain in information for the  $\alpha$  and  $\beta$  estimates  
292 from the current trial to the next (Shannon, 1948). That is, the stimulus position that will  
293 theoretically aid in maximally efficient parameter estimation is selected on each trial.

### 294 295 *2.5.2 Parameter estimation*

296  
297 Once the participant makes their selection at the stimulus location, the Psi algorithm uses Bayes'  
298 rule to estimate the most likely  $\alpha$  and  $\beta$  values given the prior and the current response ( $r$ ):  
299

$$300 \quad p_{[t]}(\lambda|x, r) = \frac{p_{[t]}(\lambda)p(r|\lambda, x)}{\sum_{\lambda} (p_{[t]}(\lambda)p(r|\lambda, x))} \quad (5)$$

301  
302 The prior,  $p_{[t]}(\lambda)$ , is a joint probability distribution representing the initial guess of  $\alpha$  and  $\beta$  values.  
303 The prior for the first trial was the same for all participants. We assumed that the most likely  $\alpha$   
304 was 0 with a wide standard deviation:  $\alpha \sim N(0, 20)$ . Similarly, we assumed a reasonably wide prior  
305 distribution for  $\beta$ , with an expected value of 20:  $\beta \sim Exponential(20)$ . On subsequent trials, the  
306 posterior for trial  $t$  became the prior for trial  $t+1$  ( $p_{[t+1]}(\lambda) = p_{[t]}(\lambda|x, r)$ ). The likelihood in equation  
307 5,  $p(r|\lambda, x)$ , is the probability of the participant's response given each parameter value at the  
308 stimulus position. As suggested by Kostovich and Tyler, we created a pair of lookup tables to  
309 improve computational efficiency, one for each response, which served as indexable likelihoods  
310 for each stimulus:

$$311 \quad p(r = "left"|\lambda, x) = \psi \quad (6a)$$
$$312 \quad p(r = "right"|\lambda, x) = 1 - \psi \quad (6b)$$

313  
314  
315 The individual  $\alpha$  and  $\beta$  estimates were calculated by marginalizing over the joint posterior  
316 distribution (equation 5) and taking the mean of each marginalized distribution (Emerson, 1986).  
317 We used the final  $\alpha$  and  $\beta$  estimates after the last (75<sup>th</sup>) trial for our agreement analyses.

### 318 319 *2.7. Statistical analysis*

320  
321 We used a Bayesian approach to make statistical inferences for the validity of responses and the  
322 agreement of PSE and uncertainty estimates. This approach enabled us to calculate the full  
323 posterior probability distribution of model parameters, providing a complete picture that quantifies  
324 our uncertainty. Thus, it naturally emphasizes estimation over binary decision rules in accordance  
325 with recommendations made by the American Statistical Association and others (Kruschke, 2013;  
326 Kruschke and Liddell, 2018; Wasserstein and Lazar, 2016).

327  
328 For each analysis, we started by defining a statistical model that was consistent with our question  
329 and the data structure. Next, we calculated the posterior probability of all parameter values in the  
330 statistical model using Bayes' rule, combining our prior assumptions regarding parameter values  
331 (i.e., the prior) with evidence from our data (i.e., the likelihood). We selected the distribution for  
332 each parameter's prior as reasonably wide and uninformative, using its maximum entropy  
333 distribution (McElreath, 2016). We used the Pymc4 (version 4.3) library (Salvatier et al., 2016) in  
334 Python (version 3.11) to perform Markov Chain Monte Carlo (MCMC) sampling to estimate the  
335 posterior probability distributions. We drew 10,000 samples from the posterior in each of 4 chains  
336 (i.e., 40,000 total samples), using 2,000 tuning samples in each chain. We performed diagnostics  
337 for each model, ensuring parameter values were consistent across chains and checking posterior

338 estimates for possible errors (Kruschke, 2014; McElreath, 2016). We provide the full models and  
339 code, including detailed information about the priors and diagnostics, online at  
340 (<https://osf.io/g8nx4/>). We made inferences based on the posterior distribution of the model  
341 parameters, reporting the 95% high density interval (HDI), defined as the narrowest span of  
342 credible values that contains 95% of the posterior distribution (Kruschke, 2014). In cases in which  
343 we wanted to quantify support for the “null” hypothesis, we also calculated the percent of credible  
344 parameter values that fell within a region of practical equivalence (ROPE; Kruschke, 2014).

345  
346 First, we ensured that responses were not confounded by movement direction, a concern based  
347 on a prior study (Vazquez et al., 2015). We modeled each participant’s response data using a  
348 Bayesian logistic regression. Since the response data on each trial ( $t$ ) were binary, we modeled  
349 them as a Bernoulli distribution where the probability of responding “left” ( $p_{left}$ ) was impacted by  
350 the stimulus location ( $X_{Stimulus}$ ), the movement direction ( $\beta_{Move\ direction}$ ), and the participant  
351 ( $\alpha_{Participant}$ ):

$$352$$
$$353 \text{Response}_{[t]} \sim \text{Bernoulli}(p_{left[t]}) \quad (7a)$$

$$354 \text{logit}(p_{left[t]}) = \alpha_{Participant[i]} + \beta_{Move\ direction[j]} + \beta_{Stimulus} X_{Stimulus[t]} \quad (7b)$$
$$355$$

356 We included data from both tests for each participant in this model. Stimulus position was coded  
357 as a continuous variable. Movement direction and participant were coded as indexing variables,  
358 meaning separate  $\alpha_{Participant}$  posteriors were computed for each participant ( $i$ ; 13 total alphas),  
359 representing each participant’s bias to judge “left” independent of movement direction or stimulus  
360 position, and two separate group level  $\beta_{Move\ direction}$  posteriors were computed for each  
361 movement direction ( $j$ ; forward and backward; 2 total  $\beta_{Move\ direction}$  parameters) to the stimulus  
362 position. We reasoned that if moving forward or backward had no influence on responses, the  
363 two posterior distributions for  $\beta_{Move\ direction}$  should be identical. We therefore calculated the  
364 difference in probability between the  $\beta_{Move\ direction}$  posterior distributions, setting a ROPE for this  
365 contrast between -0.1 and 0.1 in terms of probability.

366  
367 To assess test-retest agreement, we used the Bland-Altman method (Altman and Bland, 1983;  
368 Giavarina, 2015). The Bland-Altman method is recommended to assess agreement because it  
369 specifically tests for biases across the range of “true” scores of a given variable, where a proxy  
370 for the true score is the mean of an individual’s score on Test 1 and Test 2 (Bland and Altman,  
371 1986). The method involves 3 analyses: 1) calculating the mean bias between the two estimates,  
372 2) calculating the bias across “true” values, and 3) determining the limits of agreement, calculated  
373 as the mean of the difference in estimates  $\pm 1.96$  times the standard deviation of the difference in  
374 estimate. To test for biases in steps 1 and 2 we applied Bayesian inference instead of the  
375 frequentist methods typically used in the Bland-Altman method. We determined if there was a  
376 mean bias by estimating the distribution of differences between Test 1 and Test 2 for the PSE  
377 and uncertainty estimates separately. We modeled these contrasts as a normal distribution,  
378 estimating the most likely  $\mu$  and  $\sigma$  values that could have generated each individual’s ( $i$ ) estimated  
379 difference from Test 1 to Test 2:

$$380$$
$$381 \text{Difference}_{[i]} \sim \text{Normal}(\mu, \sigma) \quad (8)$$
$$382$$

383 We focused our inference on the posterior distribution for  $\mu$ , which, if no bias was present, should  
384 be close to zero. We therefore set a ROPE between -5 and 5 mm. We determined if there was a  
385 bias across the range of “true” values of PSE and uncertainty using a Bayesian regression  
386 analysis. The outcome variable, differences between Test 1 and Test 2 estimates for each



387 participant ( $Y_{[i]}$ ), was modeled as a normal distribution with the mean ( $\mu$ ) being predicted by the  
388 “true” PSE/uncertainty value ( $X_{true}$ ):

$$389 \quad Y_{[i]} \sim Normal(\mu_{[i]}, \sigma) \quad (9a)$$

$$391 \quad \mu_{[i]} = b + m X_{true[i]} \quad (9b)$$

392  
393 Here, a bias will manifest as an intercept ( $b$ ) and slope ( $m$ ) with magnitudes greater than 0.  
394 Therefore, we set a ROPE for the intercept between -5 and 5 mm and a ROPE for the slope  
395 between -0.1 and 0.1, which would translate to a 1 mm change in bias for a 10 mm change in  
396 “true” score. We defined good agreement as little to no evidence of a mean bias or a bias across  
397 true scores. Specifically, 90% of the posterior distributions calculated in the Bland-Altman analysis  
398 should not fall outside the ROPEs. We also performed a secondary analysis to determine if perfect  
399 agreement was at least plausible by characterizing the relationship between Test 1 and Test 2 for  
400 both the PSE and uncertainty estimates. Perfect agreement would result in a slope of 1 and an  
401 intercept of 0. We again used a Bayesian regression model, except the estimate on Test 2 was  
402 the outcome variable ( $Y_{Test\ 2}$ ) and the estimate on Test 1 was the predictor variable ( $X_{Test\ 1}$ ):

$$403 \quad Y_{Test\ 2[i]} \sim Normal(\mu_{[i]}, \sigma) \quad (10a)$$

$$405 \quad \mu_{[i]} = b + m X_{Test\ 1[i]} \quad (10b)$$

406  
407 Here the HDIs for  $m$  characterize the relationship between Test 1 and 2.

### 408 409 **3. Results and discussion**

#### 410 411 *3.1. Movement direction did not influence participant responses*

412  
413 Thirteen participants (8 female, 5 male) completed the study. Data for one representative  
414 participant are displayed in Figure 1C. The psychometric functions (solid curves) were produced  
415 from the PSE ( $\alpha$ ) and uncertainty ( $\beta$ ) estimates after the 75<sup>th</sup> trial and superimposed onto the  
416 empirical data (dots). For both tests, PSE values were positively biased (Test 1 mean [95% HDI]  
417 = 12.0 mm [3.3 20.6]; Test 2 = 15.3 mm [5.3 25.2]) and uncertainty measures (i.e., SDs) were just  
418 under 20mm (Test 1 = 18.2 mm [14.4 21.8]; Test 2 = 17.5 mm [13.5 21.4]). Our first concern,  
419 based on a prior study (Vazquez et al., 2015), was to ensure that we controlled for the potential  
420 confound that movement direction may have had on responses. While the empirical probability of  
421 responding left when moving backward and forward (Figure 1D, left) appear similar, we also  
422 determined the individual impact of movement direction on responses using a Bayesian logistic  
423 regression. If movement direction did play a major role in responses, the difference in probabilities  
424 for  $\beta_{Move\ direction\ [Forward]}$  vs  $\beta_{Move\ direction\ [Backward]}$  would be large, making the contrast largely  
425 different from 0. However, we found that the movement direction contrast was practically equal to  
426 0 (Figure 1D, right; posterior mean [95% HDI], contrast = 0.04 [-0.01, 0.09], 99.3% in the ROPE).  
427 Thus, randomizing the start positions prevented biased responses.

#### 428 429 *3.2. Bland-Altman analysis revealed good agreement for both PSE and uncertainty estimates*

430  
431 We used the Bland-Altman method to assess agreement (Figure 2A). First, we calculated the  
432 limits of agreement for PSE and uncertainty estimates (-22.3 to 15.5 mm and -10.1 to 11.6 mm,  
433 respectively; dotted lines in Figure 2A). Limits of agreement for both were relatively narrow  
434 considering the scale of the measurement, and the PSE limits were consistent with the range of  
435 values observed in previous work (Vazquez et al., 2015) which used 33 more trials than the  
436 current method. Next, we characterized the mean bias between Test 1 and Test 2 for PSE and

437 uncertainty estimates (histograms in Figure 2A). Both biases were very close to 0. The average  
438 bias for PSE was  $-3.3\text{mm}$   $[-9.0, 2.8]$  (72.4% in ROPE). In other words, while the PSE was  
439 nominally lower on Test 2 than Test 1, we can be fairly confident that there is little-to-no bias for  
440 PSE measurements. With regard to uncertainty estimates, there was effectively no bias as the  
441 95% HDI was fully within the ROPE ( $0.7\text{mm}$   $[-2.8, 4.1]$ , 98.8% in ROPE).  
442

443 Next, we tested for evidence of a bias across different “true” PSE and uncertainty estimates,  
444 where the true estimate is represented by the mean of an individual’s estimates on Test 1 and  
445 Test 2 (i.e., the x-axis in the Bland-Altman plot), using a Bayesian linear regression model (solid  
446 regression line and shading in Figure 2A). For PSE, there was a small negative slope, although  
447 the most credible estimates surrounded a slope estimate of zero ( $-0.15$   $[-0.56, 0.28]$ , 29.6% in  
448 ROPE), and the intercept was unbiased ( $-1.3$   $[-9.5, 6.9]$ , 76.0% in ROPE). These results indicate  
449 that participants with larger PSE values tend have increased bias between test 1 and 2. However,  
450 even when considering the largest mean PSE of  $\sim 40\text{mm}$ , this only produces a bias of  $-6\text{mm}$ .  
451 Therefore, we interpret this bias as negligible. For uncertainty estimates, the most probable  
452 regression was very similar to a line with 0 slope and 0 intercept (slope =  $-0.08$   $[-0.69, 0.58]$ ,  
453 24.5% in ROPE; intercept =  $2.0$   $[-9.8, 13.8]$ , 58.4% in ROPE). Combined, both Bland-Altman  
454 results show that estimated PSE and uncertainty values remain largely consistent across test-  
455 retest sessions and across the range values, a sign of good agreement for this method.  
456

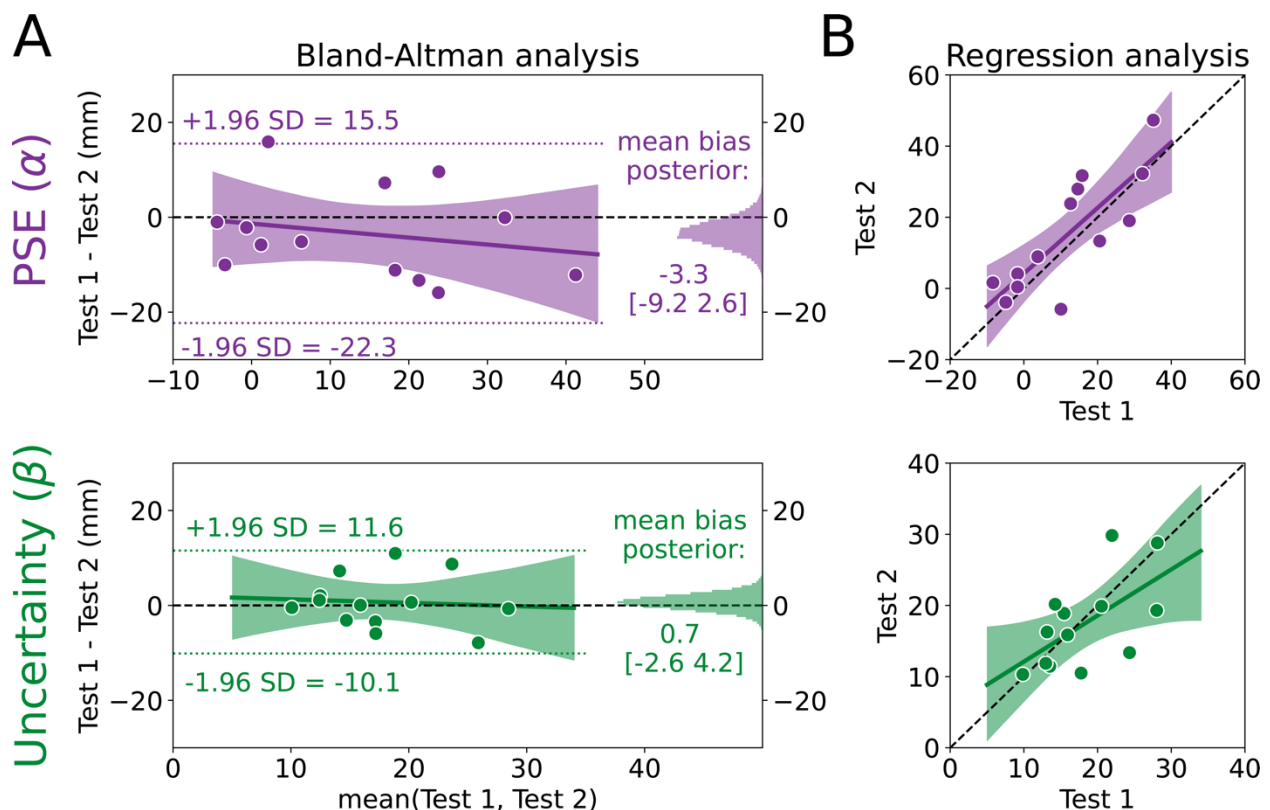

457 **Figure 2: Point of subjective equality (PSE) and uncertainty estimates have good agreement.** (A) Bland-Altman  
458 plot for the PSE ( $\alpha$ ; top) and uncertainty ( $\beta$ ; bottom) estimates. The mean of Test 1 and Test 2 for each individual is  
459 plotted on the x-axis and the difference between the two tests is plotted on the y-axis. Thus, each dot represents one  
460 individual. The limits of agreement are plotted as the dotted lines, and the posterior distributions for the mean biases  
461 are plotted on the right sides as histograms. The most probable regression line is the solid line with the shading  
462 representing the 95% high density interval (HDI), with the black dashed line at 0 as a reference (B) Regression model  
463 for PSE and uncertainty. Estimates for Test 2 are plotted against estimates for Test 1 for each individual (dots) with the  
464 unity line (black dashed line) provided as a reference for perfect agreement. The most probable regression line is the  
465 solid line with the shading representing the 95% HDI.  
466

467 As a secondary analysis, we characterized the relationship between estimates on Test 1 and Test  
468 2 to determine if something close to perfect agreement (slope=1, intercept=0) was at least  
469 plausible, again using a Bayesian linear regression model. Whereas the Bland-Altman analysis  
470 uses information from the two tests to estimate a “true” score (the x-axes in Fig 2A), the regression  
471 analysis measures the difference between the two tests without sharing information across tests.  
472 Figure 2B shows the most credible regression lines for PSE (top) and uncertainty (bottom)  
473 estimates, with the shading representing the 95% HDI. While there were credible slope values  
474 that fell both above and below one (slope = 0.92 [0.49, 1.38], intercept = 4.2 [-3.7, 12.4]), the  
475 single best PSE estimate (maximum a posteriori) between Tests 1 and 2 was very nearly one.  
476 The uncertainty estimates indicated that this parameter is less likely to perfectly reproduce the  
477 scores on Test 1 and Test 2 (slope = 0.65 [0.09, 1.19], intercept = 5.6 [-5.1, 15.8]). Interestingly,  
478 the results of this secondary analysis seemingly conflict with the Bland-Altman analysis. However,  
479 we see them as complementary: While the average bias is low and consistent across scores, the  
480 uncertainty values are less likely to be exactly reproduced from Test 1 to Test 2 compared to the  
481 PSE values. This might be interpreted as a reduction in uncertainty from Test 1 to Test 2 indicating  
482 a practice effect, however, individuals with lower uncertainty on Test 1 demonstrated increased  
483 uncertainty on Test 2. Consistent with reports in other psychophysical assessments, measures of  
484 uncertainty are more difficult to recover compared to PSE (King-smith and Rose, 1997;  
485 Kontsevich and Tyler, 1999; Turpin et al., 2010). Together, the results of this secondary analysis  
486 suggest that, while there is evidence of variability across test sessions, it is well within an  
487 acceptable range for psychophysical assessment. Indeed, the 95% HDI for PSE and uncertainty  
488 estimates both included what we would expect if the tests had perfect agreement.

489  
490 As further evidence of good agreement in our method, and to make direct comparisons with other  
491 studies, we also calculated intraclass correlation coefficients ( $ICC_{2,1}$ ), another commonly used  
492 metric of agreement (Berchtold, 2016; Kottner et al., 2011; McGraw and Wong, 1996). The ICC  
493 values for PSE ( $ICC_{2,1}$  [95% CI] = 0.80 [0.48, 0.93]) and uncertainty (0.61 [0.05, 0.85]) indicate  
494 good agreement (Portney and Watkins, 2009). These values fall within ranges of other  
495 psychophysics studies using the Psi algorithm and the method of constants, as those studies  
496 report ICCs for PSE estimates that range between 0.48 to 0.96 for the Psi algorithm (Schilling et  
497 al., 2017; Silva et al., 2020), and between 0.77 to 0.88 for the method of constants (Nicholson et  
498 al., 1997). Our method also compares favorably to other proprioception-specific assessments with  
499 ICCs ranging from 0.11 to 0.95 for measures of proprioceptive accuracy (Antcliff et al., 2021; Arvin  
500 et al., 2015; Deshpande et al., 2003; Gorst et al., 2020; Hillier et al., 2015; Rinderknecht et al.,  
501 2018), and from 0.0 to 0.64 for measures of proprioceptive variability (Juul-Kristensen et al., 2008;  
502 Rahlf et al., 2019; Strong et al., 2021). The fact that the current method has good agreement for  
503 both proprioceptive PSE and uncertainty opens the door for future studies to assess the  
504 importance of uncertainty to lower limb function.

### 505 506 *3.3. Agreement was similar after 50 trials*

507  
508 One of our primary goals for this method was to maximize efficiency. Participants took an average  
509 of  $20 \pm 1$  minutes to complete testing (including the two short walking breaks). The simplest way  
510 to reduce this time would be to reduce the number of trials, however, there is a risk that reducing  
511 the number of trials would also reduce the agreement of the PSE and uncertainty estimates. Since  
512 the Psi algorithm estimates PSE and uncertainty after every trial, we can assess agreement after  
513 any trial during the test. As a post-hoc analysis, we chose to assess agreement after 50 trials as  
514 the test time at this point would have been between 10-15 minutes. We found that all our  
515 measures of agreement were similar after 50 and 75 trials (Table 1). In contrast, examining  
516 agreement after 25 trials revealed a substantial reduction in agreement. Therefore, decreasing  
517 the number of trials to 50 would significantly reduce the time of the test without sacrificing

518 agreement, providing a reasonable timeframe for a test to be placed in the middle of a motor  
 519 learning paradigm or to be used for a balance and falls risk assessment.

520

521 **Table 1: Agreement comparison after 50 and 75 trials**

|                        | Limits of agreement (mm) | Bland Altman Mean Bias (mm; % in ROPE) | Bland Altman Bias Regression (mm; % in ROPE)                              | Test 1 vs Test 2 Regression                            | ICC <sub>2,1</sub> [95% CI] |
|------------------------|--------------------------|----------------------------------------|---------------------------------------------------------------------------|--------------------------------------------------------|-----------------------------|
| <b>PSE (α)</b>         |                          |                                        |                                                                           |                                                        |                             |
| 50 trials              | -22.3 to 15.7            | -3.2 [-9.2 2.6] (73.5%)                | Slope = -0.17 [-0.61 0.29] (26.2%)<br>Intercept = -1.1 [-9.3 7.1] (77.0%) | Slope= 0.91 [0.45 1.40]<br>Intercept = 4.1 [-3.9 12.0] | 0.78<br>[0.43, 0.92]        |
| 75 trials              | -22.3 to 15.5            | -3.3 [-9.0 2.8] (72.4%)                | Slope = -0.15 [-0.56 0.28] (29.6%)<br>Intercept = -1.3 [-9.5 6.9] (76.0%) | Slope= 0.92 [0.49 1.38]<br>Intercept = 4.2 [-3.7 12.4] | 0.80<br>[0.48, 0.93]        |
| <b>Uncertainty (β)</b> |                          |                                        |                                                                           |                                                        |                             |
| 50 trials              | -9.3 to 10.2             | 0.5 [-2.7 3.5] (99.5%)                 | Slope = 0.03 [-0.65 0.69] (24.3%)<br>Intercept = 0.0 [-12.5 12.2] (60.0%) | Slope= 0.57 [0.03 1.09]<br>Intercept = 7.4 [-2.8 17.4] | 0.58<br>[0.05, 0.85]        |
| 75 trials              | -10.1 to 11.6            | 0.7 [-2.8 4.1] (98.8%)                 | Slope = -0.08 [-0.69 0.58] (24.5%)<br>Intercept = 2.0 [-9.8 13.8] (58.4%) | Slope= 0.65 [0.09 1.19]<br>Intercept = 5.6 [-5.6 15.8] | 0.61<br>[0.05, 0.86]        |

522

523 **3.4. Limitations and future directions**

524

525 Despite the efficiency and good agreement of this method, we also recognize some of its  
 526 limitations. For instance, one way to increase ecological validity when measuring proprioception  
 527 would be to assess three-dimensional position sense as opposed to measuring proprioception in  
 528 only the sagittal plane as we have done here. However, we believe our results should at least  
 529 generalize to locomotor adaptation on the split-belt, given that, in this context, adaptation is often  
 530 measured in sagittal plane kinematics like step length (Reisman et al., 2005). Another potential  
 531 limitation is that during standing, although participants' limbs were passively moved by the  
 532 motorized treadmill, it is impossible to avoid some subtle movements and associated muscle  
 533 activity. While no overt movements were observed during testing, in theory, any voluntary muscle  
 534 activity might provide additional information about where the limb is located due to an efference  
 535 copy of the motor command (Wolpert et al., 1995). However, in our case, such a compromise was  
 536 unavoidable, as the primary goal of this study was to develop an assessment of lower limb position  
 537 sense in a context that most closely resembles gait.

538

539 In addition to measuring proprioception in standing, we assessed position sense of the whole  
 540 lower limb by asking individuals to focus on the end effector (foot position) when making their  
 541 judgements. Interestingly, there are few static lower extremity proprioception studies that ask  
 542 individuals to focus on end effector position (but see Sigmundsson et al., 2000; Vazquez et al.,  
 543 2015), despite the functional significance of foot position to successful gait (e.g., stepping over  
 544 curbs, trail running, etc.). Conversely, upper extremity studies frequently assess whole limb  
 545 proprioception by having participants make judgments regarding end effector position (hand or  
 546 finger (Jones et al., 2010; Vindras et al., 1998). These methods have characterized the precision  
 547 of limb position sense (van Beers et al., 1998), the relationship between static proprioception and  
 548 voluntary reaching movements (Jones et al., 2010), and the importance of static proprioception  
 549 to sensorimotor adaptation (Clayton et al., 2014; Cressman and Henriques, 2010; Simani et al.,  
 550 2007; Tsay et al., 2021; van Beers et al., 2002). Unfortunately, similar lines of research are absent  
 551 in locomotion, despite the critical role of proprioception in walking (Hiebert et al., 1996; Kriellaars  
 552 et al., 1994; Pearson, 2004; Roden-Reynolds et al., 2015; Whelan et al., 1995). We speculate  
 553 this is due at least in part to the previous absence of reliable and efficient methods of assessing  
 554 lower limb proprioception in an upright, functional, and multi-joint context. We hope the current  
 555 method opens the door to increasing understanding of the relationship between lower limb  
 556 proprioception and locomotor adaptation in young, neurotypical adults as well as in older and

557 neurologic populations, for whom changes in proprioception may have a significant impact on  
558 their ability to adapt gait patterns (Bruijn et al., 2012; Bunday and Bronstein, 2009; Lam and  
559 Pearson, 2002; Pearson, 2000; Santuz et al., 2022).

560  
561 Efficient and reliable, whole lower limb proprioceptive measurements during standing should be  
562 useful for non-adaptation studies as well. For example, proprioception is an important part of  
563 multifactorial falls assessments (Lord et al., 1991), but the proprioception test previously  
564 recommended involves active toe position matching in a non-weight bearing position. The current  
565 method offers a more ecologically valid lower limb proprioception test since it is much closer in  
566 context to when falls most often occur: during weight bearing activities like walking and transfers  
567 (Talbot et al., 2005). Furthermore, since most lower limb proprioception tests only measure  
568 proprioceptive accuracy or bias (Han et al., 2016; Hillier et al., 2015; Horváth et al., 2022), it is  
569 unknown how proprioceptive uncertainty may relate to falls, something that can now be  
570 empirically assessed using the current method.

571  
572 As there are very few studies reporting PSE and uncertainty values for the lower limbs, we were  
573 interested in comparing our values to those reported in upper extremity studies. We found that  
574 the average uncertainty estimates in the present study were quite similar to values found in upper  
575 extremity proprioception studies (Jones et al., 2010), with both falling just under 2 cm. Additionally,  
576 we found that PSE estimates here were biased, a finding consistent with intrinsic biases in  
577 perceived hand/arm position (Fuentes and Bastian, 2010; Ingram et al., 2019; Jones et al., 2010;  
578 van Beers et al., 1996). We note that the bias reported in the present study is not related to  
579 footedness, nor due to moving only the left limb, as we randomized the test limb during pilot  
580 testing and found no difference in PSE values when the left versus the right limbs were moved.  
581 Importantly, biased estimates in upper extremity studies have been linked to biases in reaching  
582 direction (Jones et al., 2010; Vindras et al., 1998), suggesting that future work in the lower  
583 extremities may benefit from examining whether PSE biases are related to step length or other  
584 gait-related movements.

#### 585 586 **4. Conclusion**

587  
588 We developed and tested the reliability of a lower limb proprioception assessment in a gait-  
589 specific context. This method is efficient, requiring only 50 trials to reliably estimate both the PSE  
590 and uncertainty of lower limb proprioception. We believe this method will aid future mechanistic  
591 understanding of locomotor adaptation and serve as a useful tool for basic and clinical  
592 researchers studying balance and falls.

#### 593 594 **Acknowledgements**

595 This work was supported by the National Institutes of Health [K12- HD055931 (HEK), R01-  
596 AG071585 (SMM), S10-RR028114 (SMM)], the National Science Foundation [M3X 1934650  
597 (HEK)], and partial funding from the University of Delaware Graduate College (JMW). We want  
598 to extend a special thank you to Saunders Penn for his help creating Figure 1A and B and for  
599 his help performing data collections.

600

601 **References**

- 602 Altman, D.G., Bland, J.M., 1983. Measurement in Medicine: The Analysis of Method  
603 Comparison Studies. *J. R. Stat. Soc. Ser. Stat.* 32, 307–317.  
604 <https://doi.org/10.2307/2987937>
- 605 Ansems, G.E., Allen, T.J., Proske, U., 2006. Position sense at the human forearm in the  
606 horizontal plane during loading and vibration of elbow muscles. *J. Physiol.* 576, 445–  
607 455. <https://doi.org/10.1113/jphysiol.2006.115097>
- 608 Antcliff, S., Welvaert, M., Witchalls, J., Wallwork, S.B., Waddington, G., 2021. Assessing  
609 Proprioception in an Older Population: Reliability of a Protocol Based on Active  
610 Movement Extent Discrimination. *Percept. Mot. Skills* 128, 2075–2096.  
611 <https://doi.org/10.1177/00315125211029906>
- 612 Arvin, M., Hoozemans, M.J.M., Burger, B.J., Verschueren, S.M.P., van Dieën, J.H., Pijnappels,  
613 M., 2015. Reproducibility of a knee and hip proprioception test in healthy older adults.  
614 *Aging Clin. Exp. Res.* 27, 171–177. <https://doi.org/10.1007/s40520-014-0255-6>
- 615 Berchtold, A., 2016. Test–retest: Agreement or reliability? *Methodol. Innov.* 9,  
616 2059799116672875. <https://doi.org/10.1177/2059799116672875>
- 617 Bland, J.M., Altman, D.G., 1986. Statistical methods for assessing agreement between two  
618 methods of clinical measurement. *Lancet Lond. Engl.* 1, 307–310.
- 619 Bosco, G., Poppele, R.E., Eian, J., 2000. Reference Frames for Spinal Proprioception: Limb  
620 Endpoint Based or Joint-Level Based? *J. Neurophysiol.* 83, 2931–2945.  
621 <https://doi.org/10.1152/jn.2000.83.5.2931>
- 622 Bruijn, S.M., Van Impe, A., Duysens, J., Swinnen, S.P., 2012. Split-belt walking: adaptation  
623 differences between young and older adults. *J. Neurophysiol.* 108, 1149–1157.  
624 <https://doi.org/10.1152/jn.00018.2012>
- 625 Bullock-Saxton, J.E., Wong, W.J., Hogan, N., 2001. The influence of age on weight-bearing joint  
626 reposition sense of the knee. *Exp. Brain Res.* 136, 400–406.  
627 <https://doi.org/10.1007/s002210000595>
- 628 Bunday, K.L., Bronstein, A.M., 2009. Locomotor adaptation and aftereffects in patients with  
629 reduced somatosensory input due to peripheral neuropathy. *J. Neurophysiol.* 102, 3119–  
630 3128. <https://doi.org/10.1152/jn.00304.2009>
- 631 Clayton, H.A., Cressman, E.K., Henriques, D.Y.P., 2014. The effect of visuomotor adaptation on  
632 proprioceptive localization: the contributions of perceptual and motor changes. *Exp.*  
633 *Brain Res.* 232, 2073–2086. <https://doi.org/10.1007/s00221-014-3896-y>
- 634 Cressman, E.K., Henriques, D.Y.P., 2010. Reach Adaptation and Proprioceptive Recalibration  
635 Following Exposure to Misaligned Sensory Input. *J. Neurophysiol.* 103, 1888–1895.  
636 <https://doi.org/10.1152/jn.01002.2009>
- 637 Cressman, E.K., Henriques, D.Y.P., 2009. Sensory Recalibration of Hand Position Following  
638 Visuomotor Adaptation. *J. Neurophysiol.* 102, 3505–3518.  
639 <https://doi.org/10.1152/jn.00514.2009>
- 640 Deshpande, N., Connelly, D.M., Culham, E.G., Costigan, P.A., 2003. Reliability and validity of  
641 ankle proprioceptive measures. *Arch. Phys. Med. Rehabil.* 84, 883–889.  
642 [https://doi.org/10.1016/s0003-9993\(03\)00016-9](https://doi.org/10.1016/s0003-9993(03)00016-9)
- 643 Dietz, V., 2002. Proprioception and locomotor disorders. *Nat. Rev. Neurosci.* 3, 781–790.  
644 <https://doi.org/10.1038/nrn939>
- 645 Elangovan, N., Tuite, P.J., Konczak, J., 2018. Somatosensory Training Improves Proprioception  
646 and Untrained Motor Function in Parkinson’s Disease. *Front. Neurol.* 9.
- 647 Emerson, P.L., 1986. Observations on maximum-likelihood and Bayesian methods of forced-  
648 choice sequential threshold estimation. *Percept. Psychophys.* 39, 151–153.  
649 <https://doi.org/10.3758/BF03211498>
- 650 Fuentes, C.T., Bastian, A.J., 2010. Where is your arm? Variations in proprioception across  
651 space and tasks. *J. Neurophysiol.* 103, 164–171. <https://doi.org/10.1152/jn.00494.2009>

- 652 Gandevia, S.C., 1985. Illusory movements produced by electrical stimulation of low-threshold  
653 muscle afferents from the hand. *Brain* 108, 965–981.  
654 <https://doi.org/10.1093/brain/108.4.965>
- 655 Giavarina, D., 2015. Understanding Bland Altman analysis. *Biochem. Medica* 25, 141–151.  
656 <https://doi.org/10.11613/BM.2015.015>
- 657 Gorst, T., Freeman, J., Yarrow, K., Marsden, J., 2020. Assessing lower limb position sense in  
658 stroke using the gradient discrimination test (GradDT™) and step-height discrimination  
659 test (StepDT™): a reliability and validity study. *Disabil. Rehabil.* 42, 2215–2223.  
660 <https://doi.org/10.1080/09638288.2018.1554008>
- 661 Han, J., Waddington, G., Adams, R., Anson, J., Liu, Y., 2016. Assessing proprioception: A  
662 critical review of methods. *J. Sport Health Sci.* 5, 80–90.  
663 <https://doi.org/10.1016/j.jshs.2014.10.004>
- 664 Harris, C.S., 1963. Adaptation to Displaced Vision: Visual, Motor, or Proprioceptive Change?  
665 *Science* 140, 812–813.
- 666 Henriques, D.Y.P., Cressman, E.K., 2012. Visuomotor adaptation and proprioceptive  
667 recalibration. *J. Mot. Behav.* 44, 435–444.  
668 <https://doi.org/10.1080/00222895.2012.659232>
- 669 Hiebert, G.W., Whelan, P.J., Prochazka, A., Pearson, K.G., 1996. Contribution of hind limb  
670 flexor muscle afferents to the timing of phase transitions in the cat step cycle. *J.*  
671 *Neurophysiol.* 75, 1126–1137. <https://doi.org/10.1152/jn.1996.75.3.1126>
- 672 Hillier, S., Immink, M., Thewlis, D., 2015. Assessing Proprioception: A Systematic Review of  
673 Possibilities. *Neurorehabil. Neural Repair* 29, 933–949.  
674 <https://doi.org/10.1177/1545968315573055>
- 675 Horváth, Á., Ferentzi, E., Schwartz, K., Jacobs, N., Meyns, P., Köteles, F., 2022. The  
676 measurement of proprioceptive accuracy: A systematic literature review. *J. Sport Health*  
677 *Sci.* <https://doi.org/10.1016/j.jshs.2022.04.001>
- 678 Ingram, L.A., Butler, A.A., Gandevia, S.C., Walsh, L.D., 2019. Proprioceptive measurements of  
679 perceived hand position using pointing and verbal localisation tasks. *PLOS ONE* 14,  
680 e0210911. <https://doi.org/10.1371/journal.pone.0210911>
- 681 Jardine, D.L., Wieling, W., Brignole, M., Lenders, J.W.M., Sutton, R., Stewart, J., 2018.  
682 Pathophysiology of the vasovagal response. *Heart Rhythm* 15, 921–929.  
683 <https://doi.org/10.1016/j.hrthm.2017.12.013>
- 684 Jones, S.A.H., Cressman, E.K., Henriques, D.Y.P., 2010. Proprioceptive localization of the left  
685 and right hands. *Exp. Brain Res.* 204, 373–383. [https://doi.org/10.1007/s00221-009-](https://doi.org/10.1007/s00221-009-2079-8)  
686 [2079-8](https://doi.org/10.1007/s00221-009-2079-8)
- 687 Juul-Kristensen, B., Lund, H., Hansen, K., Christensen, H., Danneskiold-Samsøe, B., Bliddal,  
688 H., 2008. Test-retest reliability of joint position and kinesthetic sense in the elbow of  
689 healthy subjects. *Physiother. Theory Pract.* 24, 65–72.  
690 <https://doi.org/10.1080/09593980701378173>
- 691 Kingdom, F.A.A., Prins, N., 2016. *Psychophysics: A Practical Introduction*. Academic Press.
- 692 King-smith, P.E., Rose, D., 1997. Principles of an Adaptive Method for Measuring the Slope of  
693 the Psychometric Function. *Vision Res.* 37, 1595–1604. [https://doi.org/10.1016/S0042-](https://doi.org/10.1016/S0042-6989(96)00310-0)  
694 [6989\(96\)00310-0](https://doi.org/10.1016/S0042-6989(96)00310-0)
- 695 Kontsevich, L.L., Tyler, C.W., 1999. Bayesian adaptive estimation of psychometric slope and  
696 threshold. *Vision Res.* 39, 2729–2737. [https://doi.org/10.1016/S0042-6989\(98\)00285-5](https://doi.org/10.1016/S0042-6989(98)00285-5)
- 697 Kottner, J., Audigé, L., Brorson, S., Donner, A., Gajewski, B.J., Hróbjartsson, A., Roberts, C.,  
698 Shoukri, M., Streiner, D.L., 2011. Guidelines for Reporting Reliability and Agreement  
699 Studies (GRRAS) were proposed. *J. Clin. Epidemiol.* 64, 96–106.  
700 <https://doi.org/10.1016/j.jclinepi.2010.03.002>

- 701 Kriellaars, D.J., Brownstone, R.M., Noga, B.R., Jordan, L.M., 1994. Mechanical entrainment of  
702 fictive locomotion in the decerebrate cat. *J. Neurophysiol.* 71, 2074–2086.  
703 <https://doi.org/10.1152/jn.1994.71.6.2074>
- 704 Kruschke, J., 2014. *Doing Bayesian Data Analysis: A Tutorial with R, JAGS, and Stan.*  
705 Academic Press.
- 706 Kruschke, J.K., 2013. Bayesian estimation supersedes the t test. *J. Exp. Psychol. Gen.* 142,  
707 573–603. <https://doi.org/10.1037/a0029146>
- 708 Kruschke, J.K., Liddell, T.M., 2018. *The Bayesian New Statistics: Hypothesis testing,*  
709 *estimation, meta-analysis, and power analysis from a Bayesian perspective.* *Psychon.*  
710 *Bull. Rev.* 25, 178–206. <https://doi.org/10.3758/s13423-016-1221-4>
- 711 Lam, T., Pearson, K.G., 2002. The Role of Proprioceptive Feedback in the Regulation and  
712 Adaptation of Locomotor Activity, in: Gandevia, S.C., Proske, U., Stuart, D.G. (Eds.),  
713 *Sensorimotor Control of Movement and Posture, Advances in Experimental Medicine*  
714 *and Biology.* Springer US, Boston, MA, pp. 343–355. [https://doi.org/10.1007/978-1-](https://doi.org/10.1007/978-1-4615-0713-0_40)  
715 [4615-0713-0\\_40](https://doi.org/10.1007/978-1-4615-0713-0_40)
- 716 Leek, M.R., 2001. Adaptive procedures in psychophysical research. *Percept. Psychophys.* 63,  
717 1279–1292. <https://doi.org/10.3758/BF03194543>
- 718 Livesey, E.J., Livesey, D.J., 2016. Validation of a Bayesian Adaptive Estimation Technique in  
719 the Stop-Signal Task. *PLOS ONE* 11, e0165525.  
720 <https://doi.org/10.1371/journal.pone.0165525>
- 721 Lord, S.R., Clark, R.D., Webster, I.W., 1991. Physiological Factors Associated with Falls in an  
722 Elderly Population. *J. Am. Geriatr. Soc.* 39, 1194–1200. [https://doi.org/10.1111/j.1532-](https://doi.org/10.1111/j.1532-5415.1991.tb03574.x)  
723 [5415.1991.tb03574.x](https://doi.org/10.1111/j.1532-5415.1991.tb03574.x)
- 724 Lord, S.R., Ward, J.A., 1994. Age-associated differences in sensori-motor function and balance  
725 in community dwelling women. *Age Ageing* 23, 452–460.
- 726 Mattar, A.A.G., Darainy, M., Ostry, D.J., 2013. Motor learning and its sensory effects: time  
727 course of perceptual change and its presence with gradual introduction of load. *J.*  
728 *Neurophysiol.* 109, 782–791. <https://doi.org/10.1152/jn.00734.2011>
- 729 McElreath, R., 2016. *Statistical Rethinking: A Bayesian Course with Examples in R and Stan.*  
730 CRC Press.
- 731 McGraw, K.O., Wong, S.P., 1996. Forming inferences about some intraclass correlation  
732 coefficients. *Psychol. Methods* 1, 30–46. <https://doi.org/10.1037/1082-989X.1.1.30>
- 733 Nicholson, L., Adams, R., Maher, C., 1997. Reliability of a discrimination measure for  
734 judgements of non-biological stiffness. *Man. Ther.* 2, 150–156.  
735 <https://doi.org/10.1054/math.1997.0295>
- 736 Ostry, D.J., Darainy, M., Mattar, A.A.G., Wong, J., Gribble, P.L., 2010. Somatosensory Plasticity  
737 and Motor Learning. *J. Neurosci.* 30, 5384–5393.  
738 <https://doi.org/10.1523/JNEUROSCI.4571-09.2010>
- 739 Pearson, K.G., 2004. Generating the walking gait: role of sensory feedback. *Prog Brain Res*  
740 143, 123–9. [https://doi.org/10.1016/S0079-6123\(03\)43012-4](https://doi.org/10.1016/S0079-6123(03)43012-4)
- 741 Pearson, K.G., 2000. Neural Adaptation in the Generation of Rhythmic Behavior. *Annu. Rev.*  
742 *Physiol.* 62, 723–753. <https://doi.org/10.1146/annurev.physiol.62.1.723>
- 743 Portney, L.G., Watkins, M.P., 2009. *Foundations of clinical research: applications to practice.*  
744 Pearson/Prentice Hall Upper Saddle River, NJ.
- 745 Prokop, T., Berger, W., Zijlstra, W., Dietz, V., 1995. Adaptational and learning processes during  
746 human split-belt locomotion: interaction between central mechanisms and afferent input.  
747 *Exp. Brain Res.* 106, 449–456. <https://doi.org/10.1007/BF00231067>
- 748 Proske, U., Gandevia, S.C., 2012. The Proprioceptive Senses: Their Roles in Signaling Body  
749 Shape, Body Position and Movement, and Muscle Force. *Physiol. Rev.* 92, 1651–1697.  
750 <https://doi.org/10.1152/physrev.00048.2011>



- 751 Rahlf, A.L., Petersen, E., Rehwinkel, D., Zech, A., Hamacher, D., 2019. Validity and Reliability  
752 of an Inertial Sensor-Based Knee Proprioception Test in Younger vs. Older Adults.  
753 *Front. Sports Act. Living* 1, 27. <https://doi.org/10.3389/fspor.2019.00027>  
754 Reisman, D.S., Block, H.J., Bastian, A.J., 2005. Interlimb coordination during locomotion: what  
755 can be adapted and stored? *J. Neurophysiol.* 94, 2403–2415.  
756 <https://doi.org/10.1152/jn.00089.2005>  
757 Relph, N., Herrington, L., Tyson, S., 2014. The effects of ACL injury on knee proprioception: a  
758 meta-analysis. *Physiotherapy* 100, 187–195.  
759 <https://doi.org/10.1016/j.physio.2013.11.002>  
760 Ribeiro, F., Oliveira, J., 2007. Aging effects on joint proprioception: the role of physical activity in  
761 proprioception preservation. *Eur. Rev. Aging Phys. Act.* 4, 71–76.  
762 <https://doi.org/10.1007/s11556-007-0026-x>  
763 Rinderknecht, M.D., Lamercy, O., Raible, V., Büsching, I., Sehle, A., Liepert, J., Gassert, R.,  
764 2018. Reliability, validity, and clinical feasibility of a rapid and objective assessment of  
765 post-stroke deficits in hand proprioception. *J. NeuroEngineering Rehabil.* 15, 47.  
766 <https://doi.org/10.1186/s12984-018-0387-6>  
767 Roden-Reynolds, D.C., Walker, M.H., Wasserman, C.R., Dean, J.C., 2015. Hip proprioceptive  
768 feedback influences the control of mediolateral stability during human walking. *J.*  
769 *Neurophysiol.* 114, 2220–2229. <https://doi.org/10.1152/jn.00551.2015>  
770 Ruttle, J.E., 't Hart, B.M., Henriques, D.Y.P., 2021. Implicit motor learning within three trials. *Sci.*  
771 *Rep.* 11, 1627. <https://doi.org/10.1038/s41598-021-81031-y>  
772 Salvatier, J., Wiecki, T.V., Fonnesebeck, C., 2016. Probabilistic programming in Python using  
773 PyMC3. *PeerJ Comput. Sci.* 2, e55. <https://doi.org/10.7717/peerj-cs.55>  
774 Santuz, A., Laflamme, O.D., Akay, T., 2022. The brain integrates proprioceptive information to  
775 ensure robust locomotion. *J. Physiol.* <https://doi.org/10.1113/JP283181>  
776 Schilling, T., Ohlendorf, A., Leube, A., Wahl, S., 2017. TuebingenCSTest – a useful method to  
777 assess the contrast sensitivity function. *Biomed. Opt. Express* 8, 1477–1487.  
778 <https://doi.org/10.1364/BOE.8.001477>  
779 Shannon, C.E., 1948. A mathematical theory of communication. *Bell Syst. Tech. J.* 27, 379–  
780 423. <https://doi.org/10.1002/j.1538-7305.1948.tb01338.x>  
781 Sigmundsson, H., Whiting, H.T.A., Loftesnes, J.M., 2000. Development of proprioceptive  
782 sensitivity. *Exp. Brain Res.* 135, 348–352. <https://doi.org/10.1007/s002210000531>  
783 Silva, G.M., Souto, J.J., Fernandes, T.P., Bonifacio, T.A., Almeida, N.L., Gomes, G.H.,  
784 Felisberti, F.M., Santos, N.A., 2020. Impairments of facial detection in tobacco use  
785 disorder: baseline data and impact of smoking duration. *Braz. J. Psychiatry* 43, 376–384.  
786 <https://doi.org/10.1590/1516-4446-2020-1107>  
787 Simani, M.C., McGuire, L.M.M., Sabes, P.N., 2007. Visual-Shift Adaptation Is Composed of  
788 Separable Sensory and Task-Dependent Effects. *J. Neurophysiol.* 98, 2827–2841.  
789 <https://doi.org/10.1152/jn.00290.2007>  
790 Soechting, J.F., 1982. Does position sense at the elbow reflect a sense of elbow joint angle or  
791 one of limb orientation? *Brain Res.* 248, 392–395. [https://doi.org/10.1016/0006-8993\(82\)90601-1](https://doi.org/10.1016/0006-8993(82)90601-1)  
792  
793 Sombric, C., Gonzalez-Rubio, M., Torres-Oviedo, G., 2019. Split-Belt walking induces changes  
794 in active, but not passive, perception of step length. *Sci. Rep.* 9, 16442.  
795 <https://doi.org/10.1038/s41598-019-52860-9>  
796 Stillman, B.C., McMeeken, J.M., 2001. The role of weightbearing in the clinical assessment of  
797 knee joint position sense. *Aust. J. Physiother.* 47, 247–253.  
798 [https://doi.org/10.1016/S0004-9514\(14\)60272-5](https://doi.org/10.1016/S0004-9514(14)60272-5)  
799 Strong, A., Srinivasan, D., Häger, C.K., 2021. Development of supine and standing knee joint  
800 position sense tests. *Phys. Ther. Sport Off. J. Assoc. Chart. Physiother. Sports Med.* 49,  
801 112–121. <https://doi.org/10.1016/j.ptsp.2021.02.010>

802 Talbot, L.A., Musiol, R.J., Witham, E.K., Metter, E.J., 2005. Falls in young, middle-aged and  
803 older community dwelling adults: perceived cause, environmental factors and injury.  
804 BMC Public Health 5, 86. <https://doi.org/10.1186/1471-2458-5-86>  
805 Tsay, J.S., Kim, H., Haith, A.M., Ivry, R.B., 2022. Understanding implicit sensorimotor  
806 adaptation as a process of proprioceptive re-alignment. eLife 11, e76639.  
807 <https://doi.org/10.7554/eLife.76639>  
808 Tsay, J.S., Kim, H.E., Parvin, D.E., Stover, A.R., Ivry, R.B., 2021. Individual differences in  
809 proprioception predict the extent of implicit sensorimotor adaptation. J. Neurophysiol.  
810 125, 1307–1321. <https://doi.org/10.1152/jn.00585.2020>  
811 Turpin, A., Jankovic, D., McKendrick, A., 2010. Identifying steep psychometric function slope  
812 quickly in clinical applications. Vision Res., Vision Research Reviews 50, 2476–2485.  
813 <https://doi.org/10.1016/j.visres.2010.08.032>  
814 van Beers, R.J., Sittig, A.C., Denier van der Gon, J.J., 1998. The precision of proprioceptive  
815 position sense. Exp. Brain Res. 122, 367–377. <https://doi.org/10.1007/s002210050525>  
816 van Beers, R.J., Sittig, A.C., van der Gon Denier, J.J., 1996. How humans combine  
817 simultaneous proprioceptive and visual position information. Exp. Brain Res. 111, 253–  
818 261. <https://doi.org/10.1007/BF00227302>  
819 van Beers, R.J., Wolpert, D.M., Haggard, P., 2002. When feeling is more important than seeing  
820 in sensorimotor adaptation. Curr. Biol. 12, 834–837. [https://doi.org/10.1016/S0960-9822\(02\)00836-9](https://doi.org/10.1016/S0960-9822(02)00836-9)  
821  
822 Vazquez, A., Statton, M.A., Busgang, S.A., Bastian, A.J., 2015. Split-belt walking adaptation  
823 recalibrates sensorimotor estimates of leg speed but not position or force. J.  
824 Neurophysiol. <https://doi.org/10.1152/jn.00302.2015>  
825 Vindras, P., Desmurget, M., Prablanc, C., Viviani, P., 1998. Pointing Errors Reflect Biases in the  
826 Perception of the Initial Hand Position. J. Neurophysiol. 79, 3290–3294.  
827 <https://doi.org/10.1152/jn.1998.79.6.3290>  
828 Waddington, G., Adams, R., 1999. Discrimination of active plantarflexion and inversion  
829 movements after ankle injury. Aust. J. Physiother. 45, 7–13.  
830 [https://doi.org/10.1016/s0004-9514\(14\)60335-4](https://doi.org/10.1016/s0004-9514(14)60335-4)  
831 Wasserstein, R.L., Lazar, N.A., 2016. The ASA Statement on  $p$ -Values: Context, Process, and  
832 Purpose. Am. Stat. 70, 129–133. <https://doi.org/10.1080/00031305.2016.1154108>  
833 Watson, A.B., Fitzhugh, A., 1990. The method of constant stimuli is inefficient. Percept.  
834 Psychophys. 47, 87–91. <https://doi.org/10.3758/BF03208169>  
835 Whelan, P.J., Hiebert, G.W., Pearson, K.G., 1995. Stimulation of the group I extensor afferents  
836 prolongs the stance phase in walking cats. Exp. Brain Res. 103, 20–30.  
837 <https://doi.org/10.1007/BF00241961>  
838 Wolpert, D.M., Ghahramani, Z., Jordan, M.I., 1995. An internal model for sensorimotor  
839 integration. Science 269, 1880–1882. <https://doi.org/10.1126/science.7569931>  
840  
841

842 **Figures and Tables**

843

844 **Figure 1:**

845

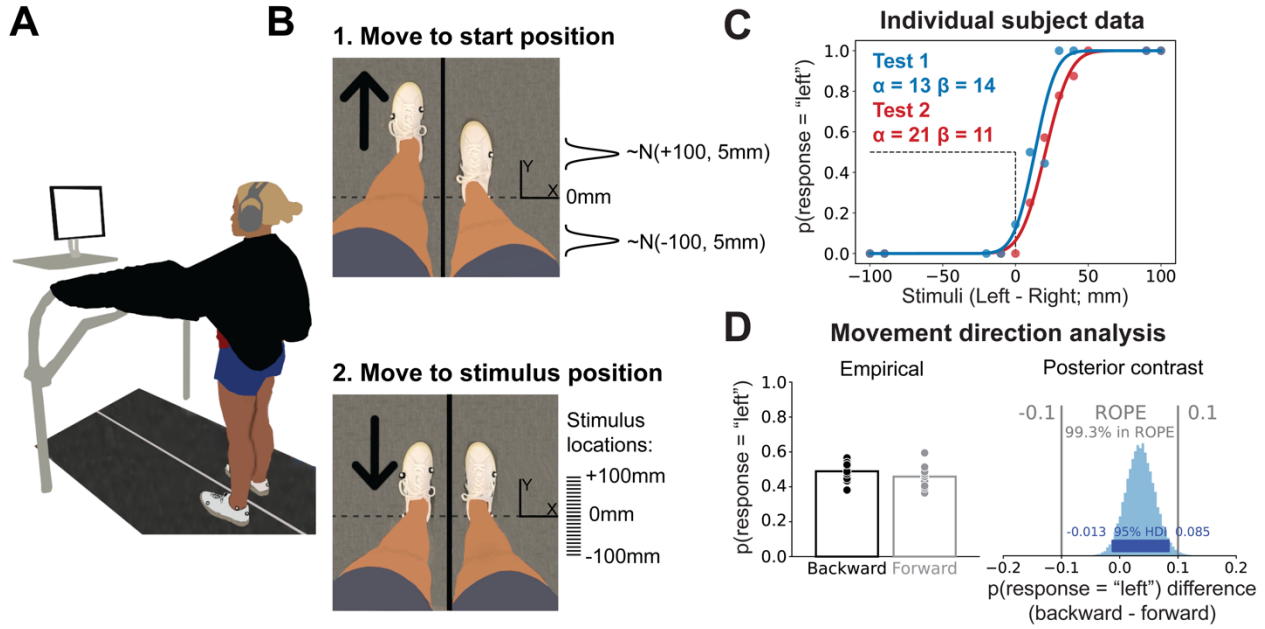

846

847

848

849

**Figure 2:**

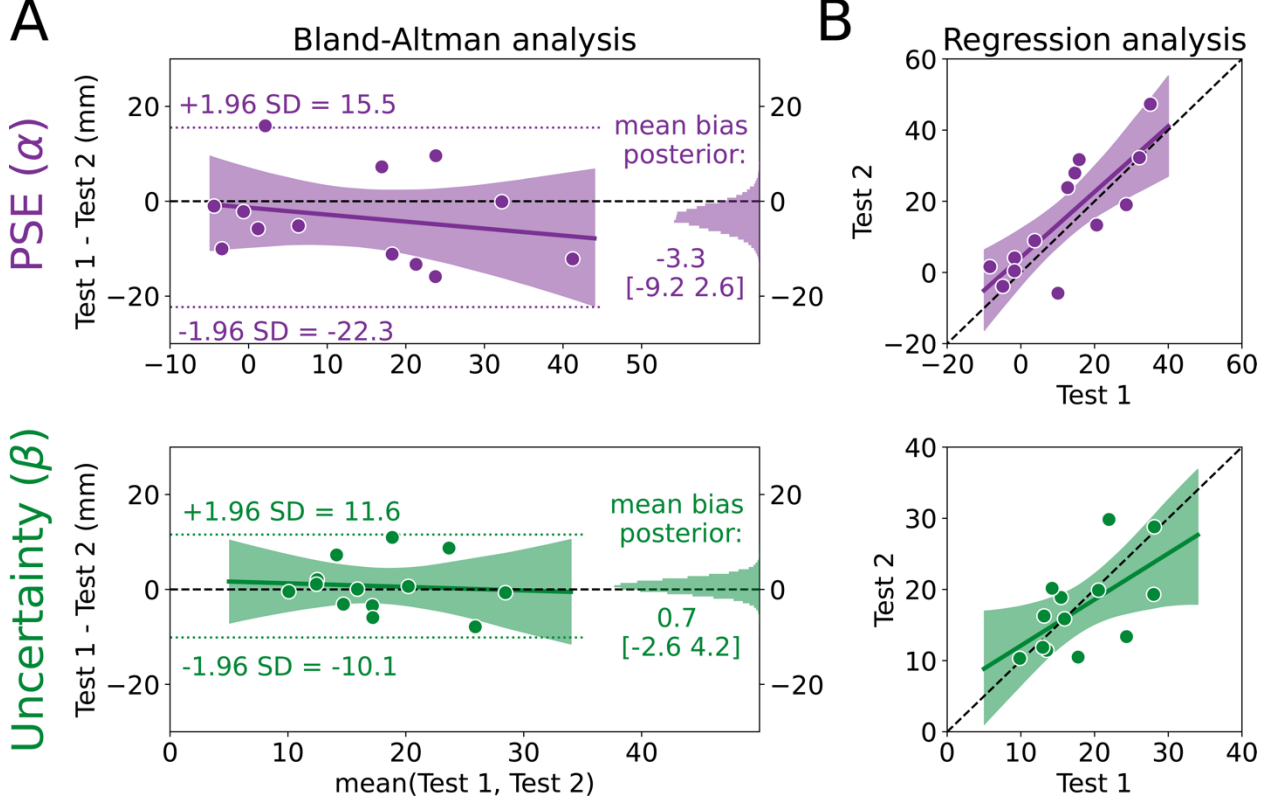

850

851

852

853 **Table 1: Agreement comparison after 50 and 75 trials**

|                                         | Limits of agreement (mm) | Bland Altman Mean Bias (mm; % in ROPE) | Bland Altman Bias Regression (mm; % in ROPE)                              | Test 1 vs Test 2 Regression                            | ICC <sub>2,1</sub> [95% CI] |
|-----------------------------------------|--------------------------|----------------------------------------|---------------------------------------------------------------------------|--------------------------------------------------------|-----------------------------|
| <b>PSE (<math>\alpha</math>)</b>        |                          |                                        |                                                                           |                                                        |                             |
| 50 trials                               | -22.3 to 15.7            | -3.2 [-9.2 2.6] (73.5%)                | Slope = -0.17 [-0.61 0.29] (26.2%)<br>Intercept = -1.1 [-9.3 7.1] (77.0%) | Slope= 0.91 [0.45 1.40]<br>Intercept = 4.1 [-3.9 12.0] | 0.78<br>[0.43, 0.92]        |
| 75 trials                               | -22.3 to 15.5            | -3.3 [-9.0 2.8] (72.4%)                | Slope = -0.15 [-0.56 0.28] (29.6%)<br>Intercept = -1.3 [-9.5 6.9] (76.0%) | Slope= 0.92 [0.49 1.38]<br>Intercept = 4.2 [-3.7 12.4] | 0.80<br>[0.48, 0.93]        |
| <b>Uncertainty (<math>\beta</math>)</b> |                          |                                        |                                                                           |                                                        |                             |
| 50 trials                               | -9.3 to 10.2             | 0.5 [-2.7 3.5] (99.5%)                 | Slope = 0.03 [-0.65 0.69] (24.3%)<br>Intercept = 0.0 [-12.5 12.2] (60.0%) | Slope= 0.57 [0.03 1.09]<br>Intercept = 7.4 [-2.8 17.4] | 0.58<br>[0.05, 0.85]        |
| 75 trials                               | -10.1 to 11.6            | 0.7 [-2.8 4.1] (98.8%)                 | Slope = -0.08 [-0.69 0.58] (24.5%)<br>Intercept = 2.0 [-9.8 13.8] (58.4%) | Slope= 0.65 [0.09 1.19]<br>Intercept = 5.6 [-5.6 15.8] | 0.61<br>[0.05, 0.86]        |

854

855 **Figure Captions**

856

857 **Figure 3. Task setup, representative data, and movement direction analysis. (A)** AFC task setup.  
858 Participants stood on the split-belt treadmill with visual feedback of their legs occluded by a black  
859 drape and auditory feedback occluded by noise cancelling headphones. The screen prompted  
860 participants to verbally respond to the question “Do you feel like your right or left foot is more forward?”  
861 when the test foot stopped at the stimulus location. **(B)** Trial sequence. 1) The test foot was moved to  
862 a start position either in front of or behind the stimulus position. Start positions were sampled from one  
863 of two normal distributions, depending on the movement direction assigned for that specific trial. 2)  
864 The test foot was moved to one of 21 possible stimulus positions between -100 and +100 mm. Tick  
865 marks (drawn to scale) represent each possible stimulus location. **(C)** Individual participant data. We  
866 reconstructed the psychometric functions from the PSE ( $\alpha$ ) and uncertainty ( $\beta$ ) estimates for Test 1  
867 (blue) and Test 2 (red). The dashed black lines, provided as a reference, represent a PSE of 0 mm.  
868 The individual dots represent the participant’s response data for each test. **(D)** Movement direction  
869 analysis. We measured the mean empirical probability of responding left when the movement direction  
870 to the stimulus position was forward (gray) vs backward (black). Dots represent individuals. We also  
871 used a Bayesian logistic regression model to analyze the unique impact of each movement direction  
872 on participant responses by calculating the difference between the posterior estimates of the  
873 movement direction coefficients (one for forward movement, one for backwards) of every participant,  
874 yielding a posterior contrast distribution (histogram) which we compared to a region of practical  
875 equivalence (ROPE). We note that 99.3% of the posterior distribution is within the ROPE, confirming  
876 that responses were not biased by movement direction to the stimulus position.

877

878 **Figure 4: Point of subjective equality (PSE) and uncertainty estimates have good**  
879 **agreement. (A)** Bland-Altman plot for the PSE ( $\alpha$ ; top) and uncertainty ( $\beta$ ; bottom) estimates. The  
880 mean of Test 1 and Test 2 for each individual is plotted on the x-axis and the difference between  
881 the two tests is plotted on the y-axis. Thus, each dot represents one individual. The limits of  
882 agreement are plotted as the dotted lines, and the posterior distributions for the mean biases are  
883 plotted on the right sides as histograms. The most probable regression line is the solid line with  
884 the shading representing the 95% high density interval (HDI), with the black dashed line at 0 as  
885 a reference **(B)** Regression model for PSE and uncertainty. Estimates for Test 2 are plotted  
886 against estimates for Test 1 for each individual (dots) with the unity line (black dashed line)  
887 provided as a reference for perfect agreement. The most probable regression line is the solid line  
888 with the shading representing the 95% HDI.

889
